# Supplementary material for: Motor performance in early life and participation in leisure‐time physical activity up to age 68 years
Source: PubMed Central journal article supplement (PMC6099324; doi:10.1111/ppe.12467), 2018-04-17
Supplement: PPE-32-327-s001.pdf [file PPE-32-327-s001.pdf]

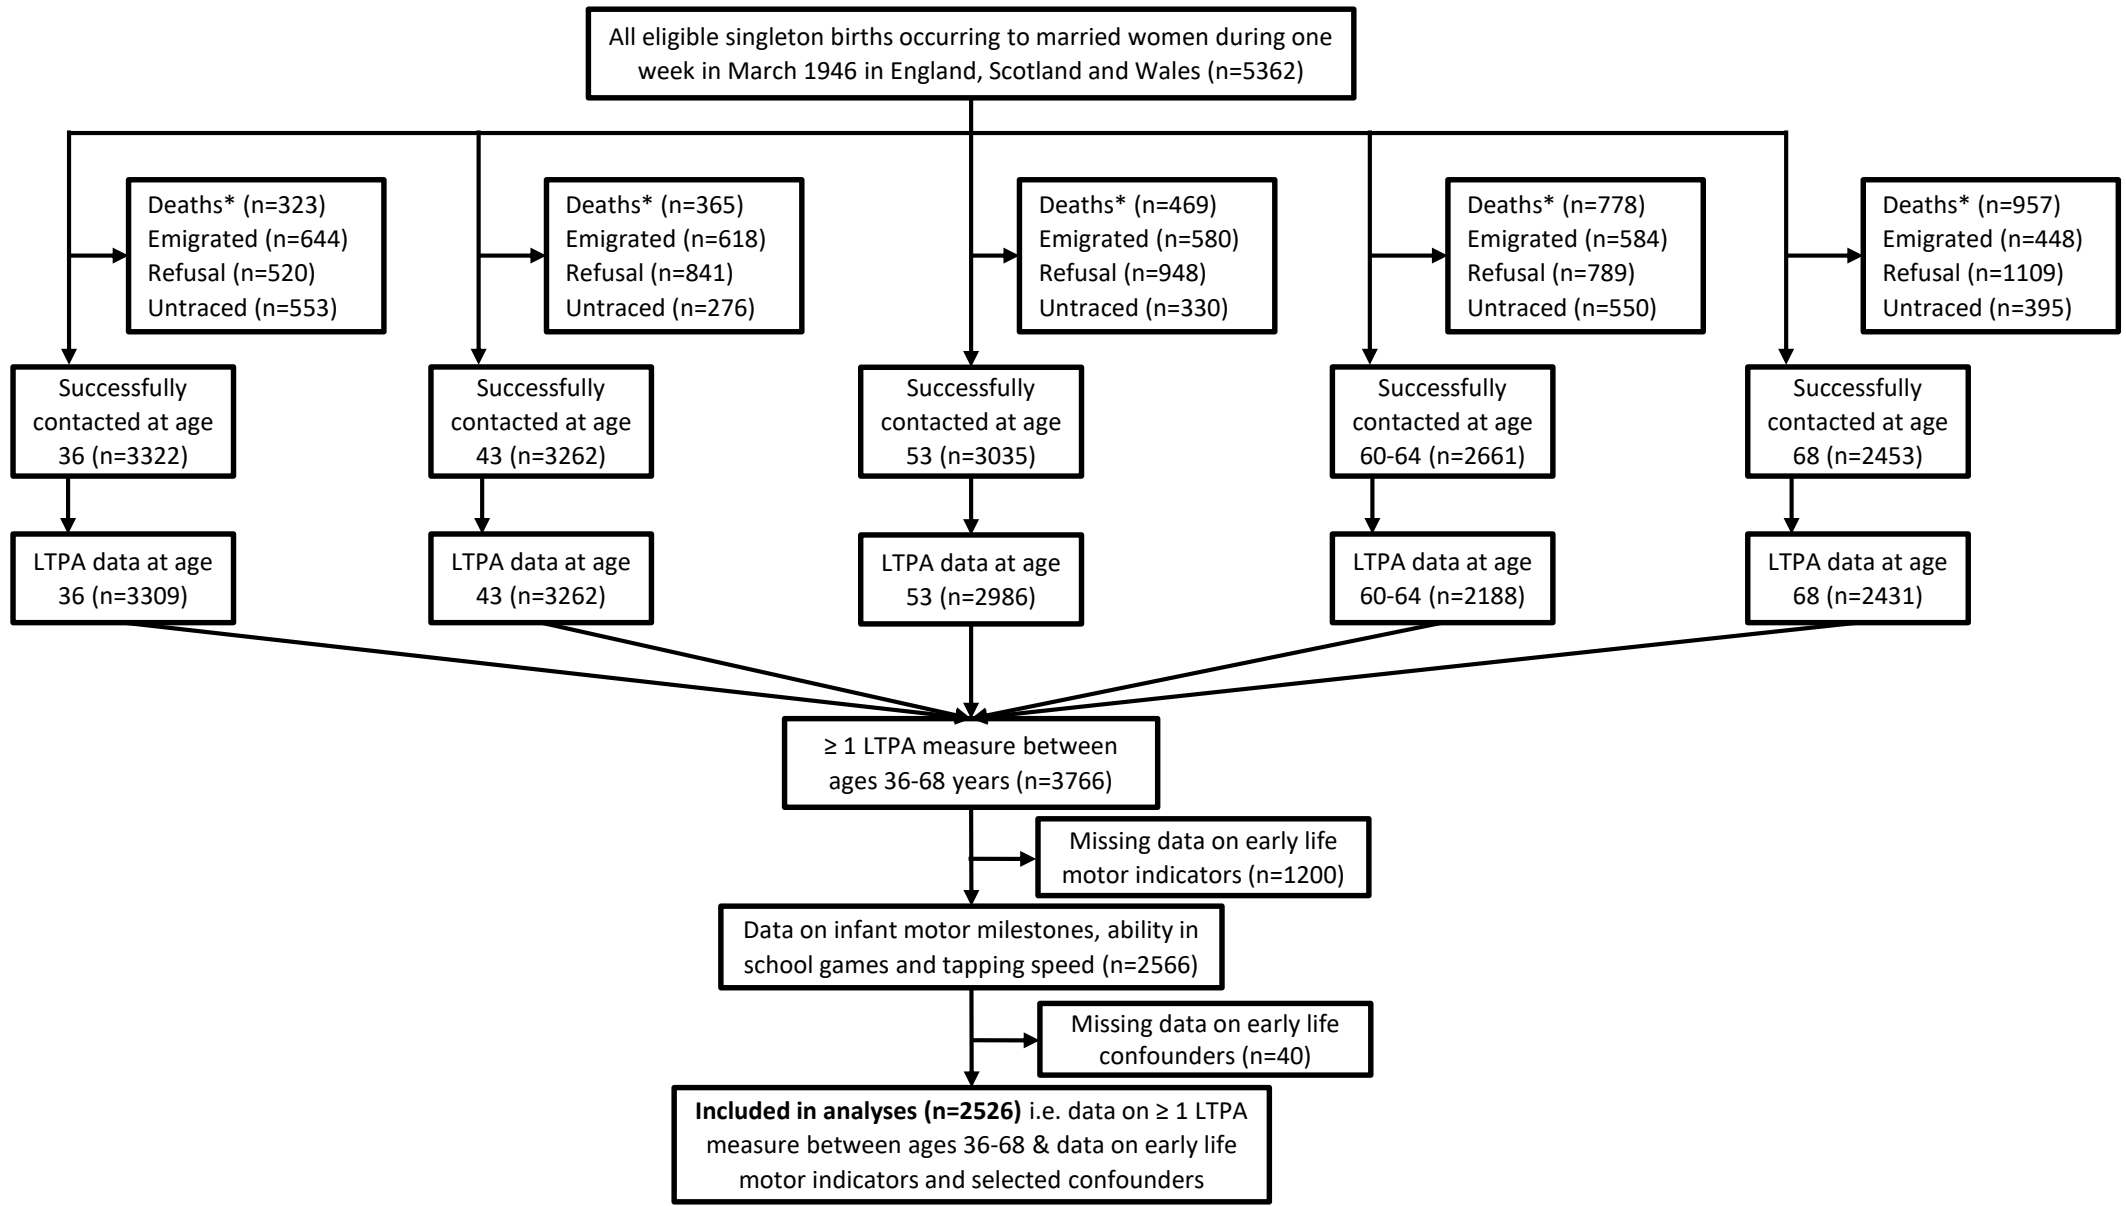

Note: Refusal includes temporary and permanent refusals and those that were in the target sample but did not respond at the specified age. Emigrated includes those temporarily living abroad.

\* Number of deaths is cumulative
